# Supplementary material for: Effect of the Ketone Body, D-β-Hydroxybutyrate, on Sirtuin2-Mediated Regulation of Mitochondrial Quality Control and the Autophagy–Lysosomal Pathway
Source: Cells. 2023 Feb 2;12(3):486. doi: 10.3390/cells12030486 (PMC9914182; doi:10.3390/cells12030486)
Supplement: Supplementary file 1 [file cells-12-00486-s001.zip › cells-2142784-supplementary.pdf]

**Supplementary Table S1.** List of primers.

| Gen             | # of NCBI reference | Primers 5'-3' (forward and reverse)               |
|-----------------|---------------------|---------------------------------------------------|
| <i>Lamp1</i>    | NM_012857.2         | CCACGTTTCAGCACCTCCA<br>GACCCAAACCTGTCACCTTCTAC    |
| <i>Lamp2</i>    | XM_006257486.4      | AGCCCAATGCCTAACACATC<br>CTGCCCTCCCAATAACAAGA      |
| <i>Ctsb</i>     | NM_022597.2         | AGGCTGGACGCAACTTCTAC<br>ACTGTTCCCGTGCATCAA        |
| <i>Ctsd</i>     | NM_134334.3         | CCTGGGCGATGTCTTTATTG<br>GCAAAGCCGACCCTATT         |
| <i>Atg5</i>     | NM_001014250.2      | ATATGAAGGCACACCCCTGA<br>GTGAGCCTCAACTGCATCCT      |
| <i>Rab7</i>     | NM_023950.4         | GGCCTTCTACAGAGGTGCAG<br>TCTTTGTGGCCACTTGTCTG      |
| <i>Map1lc3a</i> | NM_199500.2         | GACCGGCCTTTCAAGCAG<br>CCTTGTAGCGCTCGATGAT         |
| <i>Sqstm1</i>   | NM_175843.5         | CGCTTCAGCTTCTGCTTCAG<br>GGCCATTGTCAGTTCCTCAT      |
| <i>Pgc1α</i>    | NM_031347.1         | GTGCAGCCAAGACTCTGTATGG<br>GTCCAGGTCATTACATCAAGTTC |
| <i>Tfam</i>     | NM_031326.2         | GAAAGCACAAATCAAGAGGAG<br>CTGCTTTTCATCATGAGACAG    |
| <i>Tuba1a</i>   | NM_022298.1         | GATCTGATGTATGCCAAGCG<br>TCCACAGAATCCACACCAAC      |

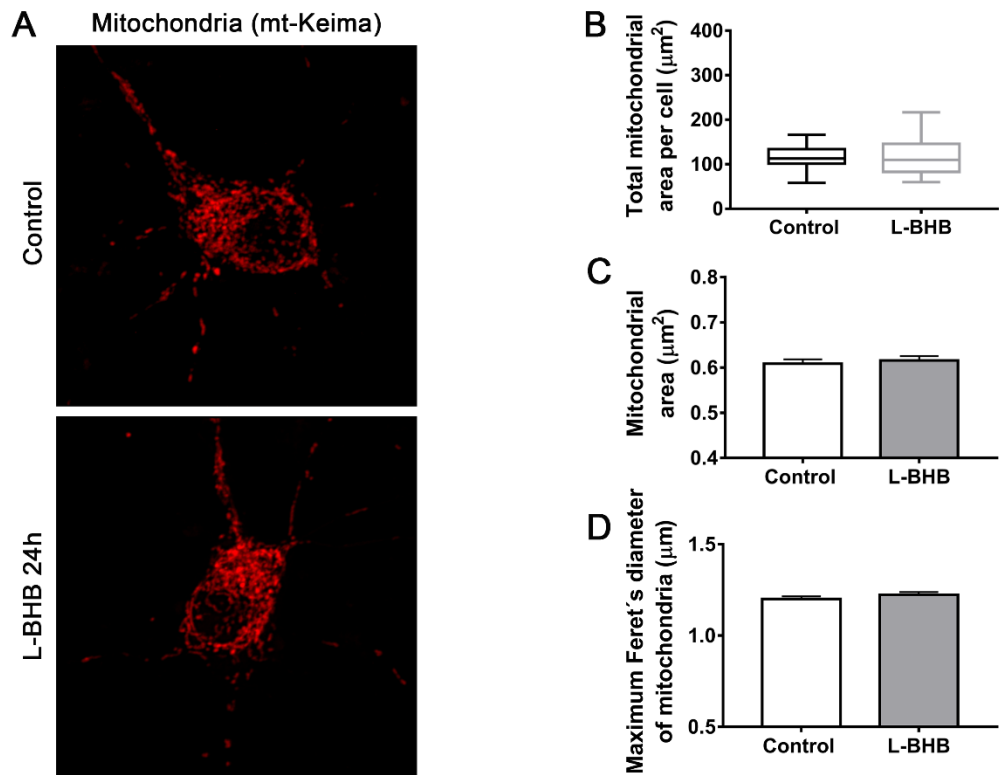

**Supplementary Figure S1.** Effect of L-BHB on mitochondrial morphology. **A)** Representative micrographs of neurons transfected with mkeima-red-mito (mt-keima) and treated and no-treated with 5 mM L-BHB for 24 h. **B)** Quantification of total mitochondrial area per cell, **C)** individual mitochondrial area and **D)** maximum Feret's diameter of mitochondria. Box-plot data (**B**) are expressed as median (line), 25<sup>th</sup> and 75<sup>th</sup> percentiles (bound of box), minimum and maximum values (whiskers) from 23 cells of 3 independent experiments. Data of **C** and **D** are expressed as Mean  $\pm$  SEM from 3 independent experiments and were analyzed by one-way ANOVA followed by Fisher's post-hoc test. Data of **B** were analyzed by Kruskal-Wallis test followed by Dunn's post hoc test.

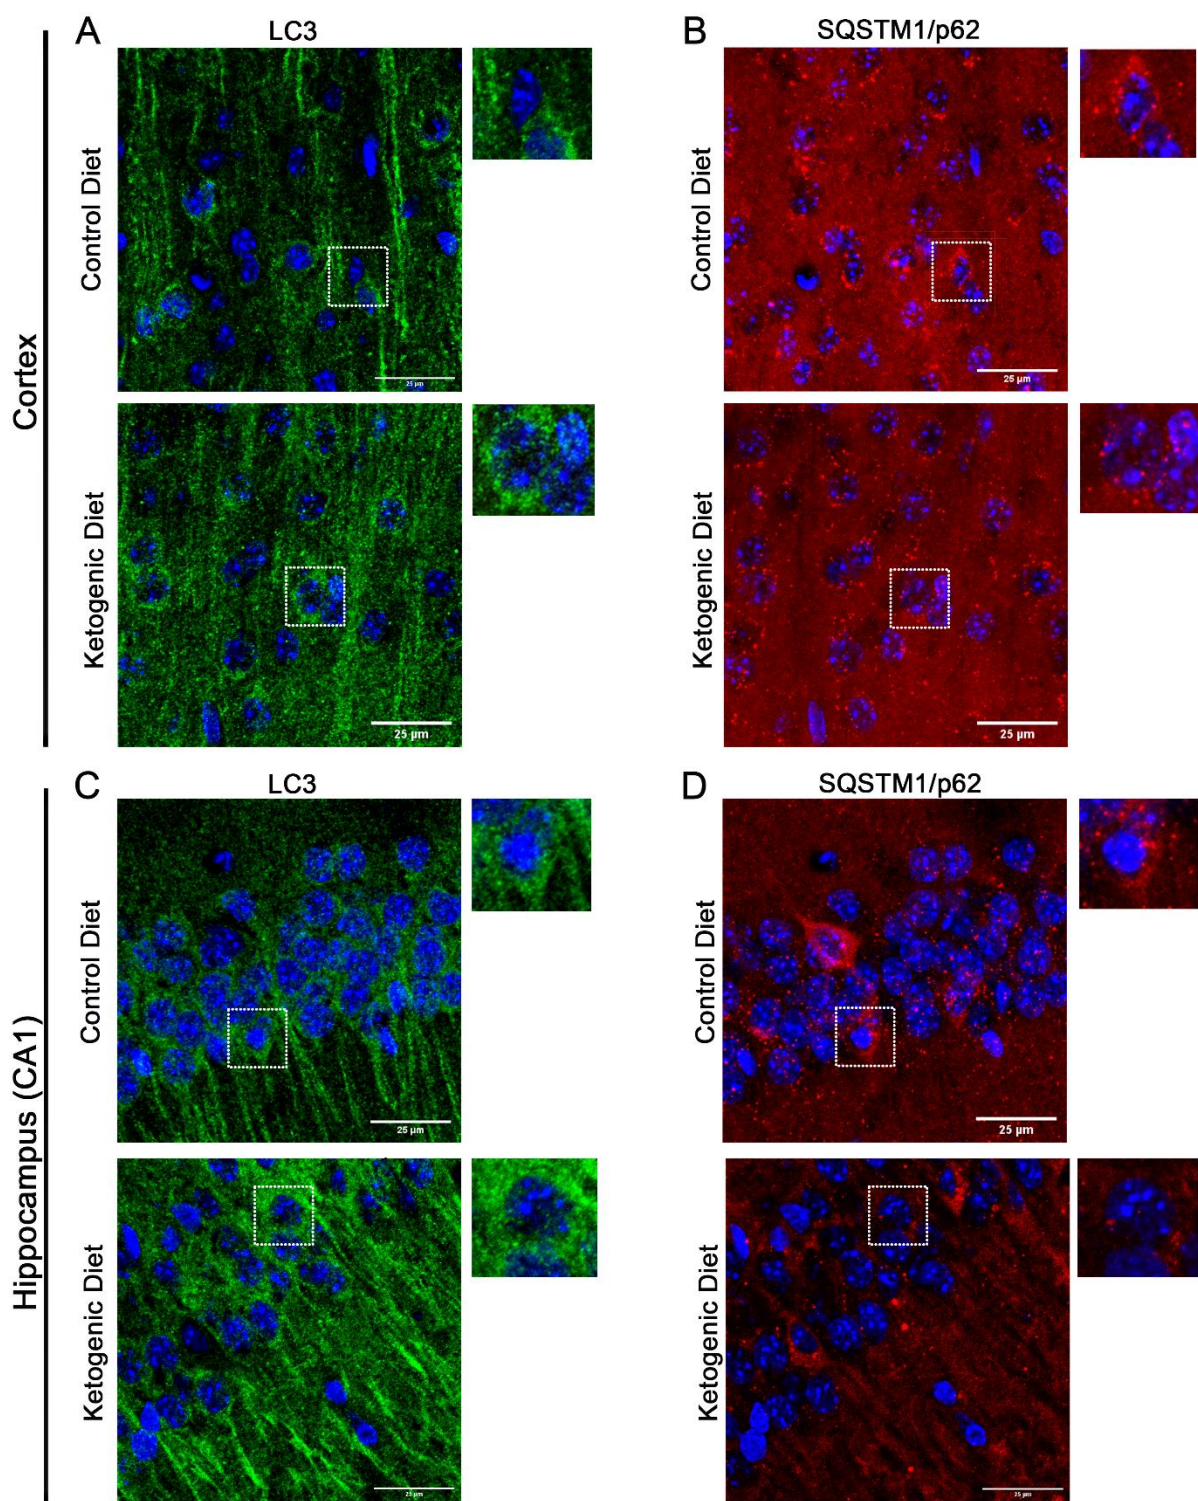

**Supplementary Figure S2.** Changes in autophagy markers in the brain of mice treated with control diet or ketogenic diet. Representative immunofluorescence of LC3 (A, C) and SQSTM1/p62 (B, D) in the cortex (A, B) and the hippocampus (C, D) of mice treated for 2 weeks with control diet (CD) or ketogenic diet (KD).

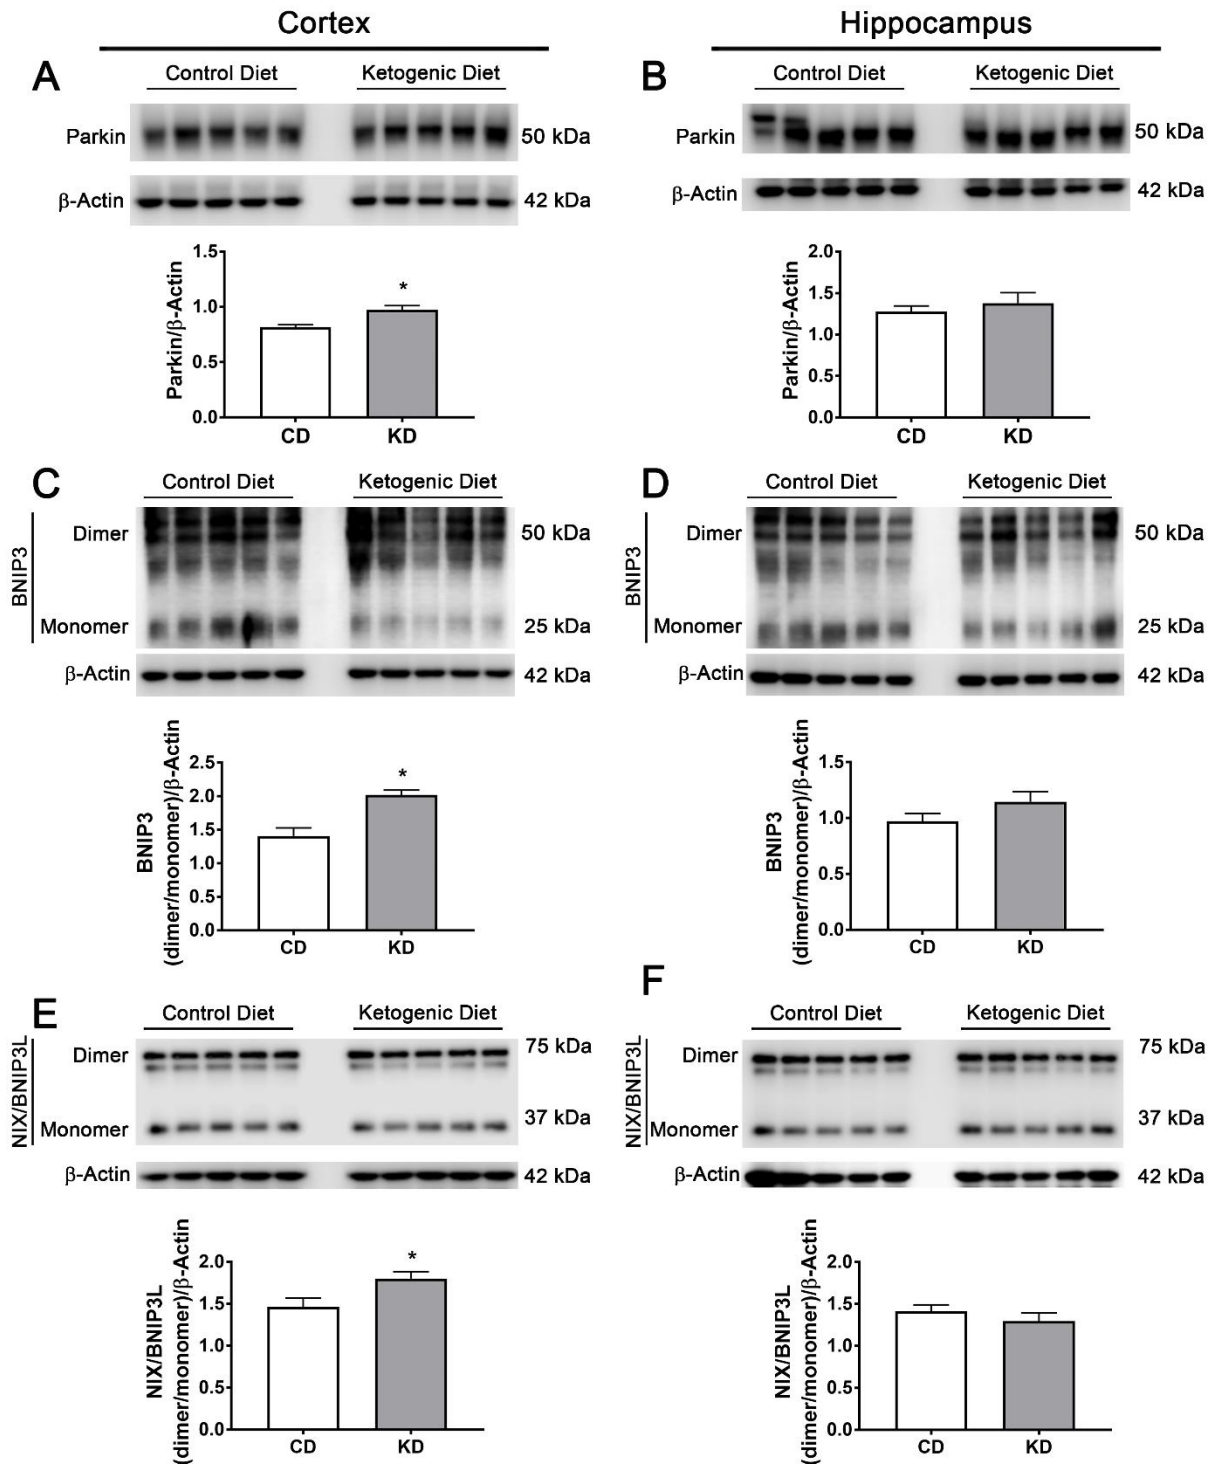

**Supplementary Figure S3.** Changes in mitophagy markers in the brain of mice treated with control diet or ketogenic diet. Representative Western blot and quantification of A and B) Parkin/ $\beta$ -actin, C and D) BNIP3 (dimer/monomer)/ $\beta$ -actin and E and F) NIX/BNIP3L (dimer/monomer)/ $\beta$ -actin in the cortex (A, C, E) and the hippocampus (B, D, F) of mice treated for 2 weeks with control diet (CD) or ketogenic diet (KD). Data are expressed as Mean  $\pm$  SEM from 5 individuals per group. Data were analyzed by Student's *t*-test. \**p*<0.05 vs control diet.
